# Supplementary material
Source: publisher figshare collection journal article supplement (https://tandf.figshare.com/articles/dataset/_/1434046)

Identification key for the Mongoose lemur (*Eulemur mongoz*) vocalizations

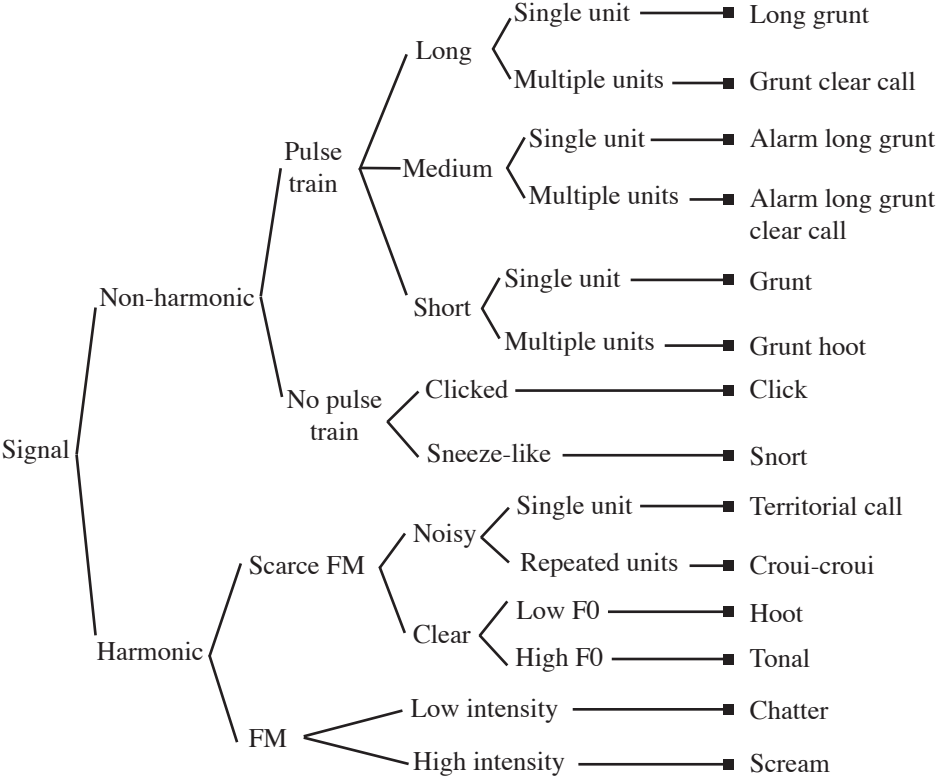

Supplement: Supplementary file 1 [file 1]
